# Supplementary material for: Development of an intramolecular charge transfer-type colorimetric and fluorescence sensor for water by fusion with a juloidine structure and complexation with boron trifluoride
Source: Royal Society of Chemistry journal article supplement (doi:10.1039/c9ra07136a), 2019-01-01
Supplement: c9ra07136a1.pdf [file c9ra07136a1.pdf]

## Supplementary Information

### **Development of an intramolecular charge transfer-type colorimetric and fluorescence sensor for water by fusion with juloidine structure and complexation with boron trifluoride**

Keiichi Imato, Toshiaki Enoki and Yousuke Ooyama\*

*Department of Applied Chemistry, Graduate School of Engineering, Hiroshima University,*

*Higashi-Hiroshima, 739-8527, Japan.*

*Fax: +81 824 24 5494; Tel: +81 824 24 7689; E-mail:yooyama@hiroshima-u.ac.jp*

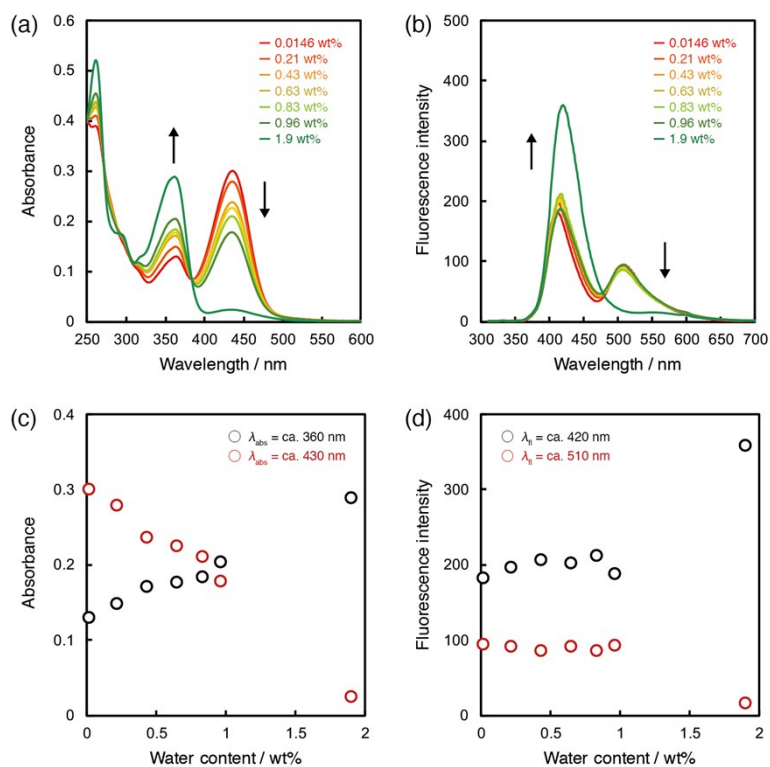

**Fig. S1** (a) Photoabsorption and (b) fluorescence spectra of **ET-1-BF<sub>3</sub>** ( $c = 2.0 \times 10^{-5} \text{ M}$ ) in acetonitrile containing 0.0146–1.9 wt% of water. Prior to the measurements, the solutions were stored in the dark for 2 days after addition of water. Peak intensities of (c) absorption bands at around 360 and 430 nm and (d) fluorescence bands at around 420 and 510 nm ( $\lambda^{\text{ex}} = 302 \text{ nm}$ ) in acetonitrile solutions of **ET-1-BF<sub>3</sub>** with 0.0146–1.9 wt% of water.

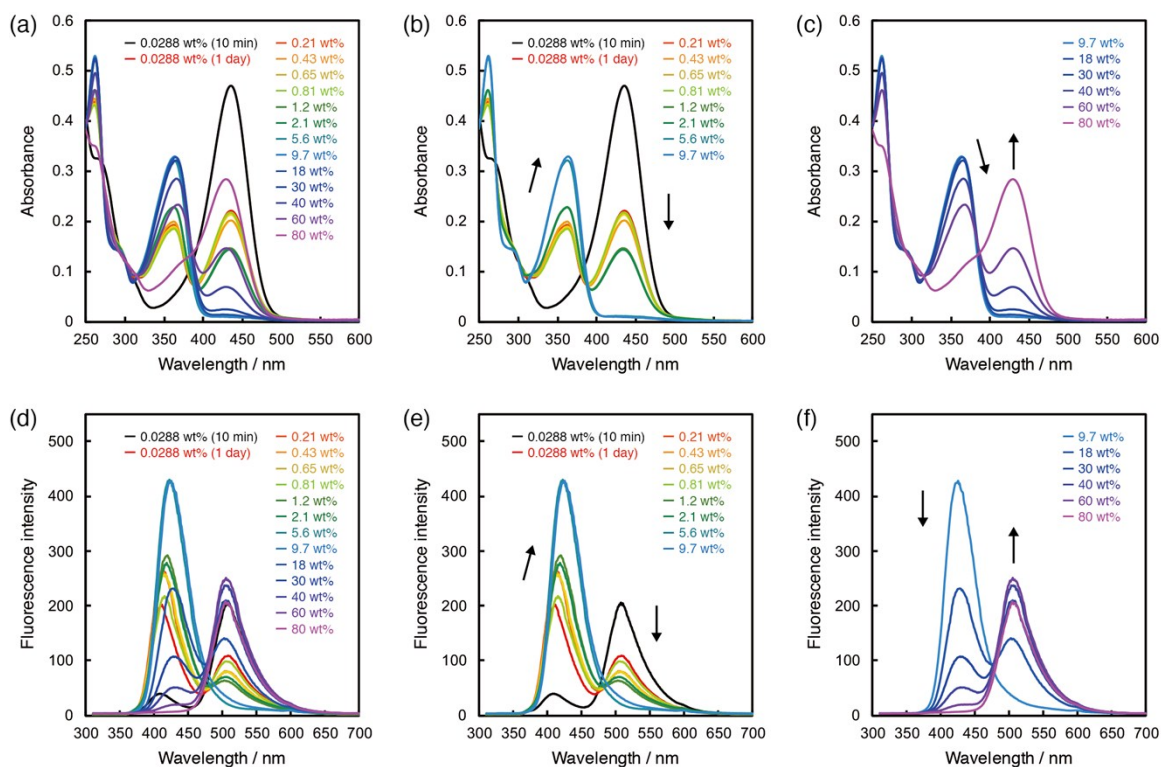

**Fig. S2** Results of another solution for demonstration of reproducibility. (a) Photoabsorption spectra of **ET-1-BF<sub>3</sub>** ( $c = 2.0 \times 10^{-5}$  M) in acetonitrile containing (a) 0.0288–80 wt%, (b) 0.0288–9.7 wt%, and (c) 9.7–80 wt% of water. Fluorescence spectra of **ET-1-BF<sub>3</sub>** ( $c = 2.0 \times 10^{-5}$  M,  $\lambda^{\text{ex}} = 302$  nm) in acetonitrile containing (d) 0.0288–80 wt%, (e) 0.0288–9.7 wt%, and (f) 9.7–80 wt% of water.

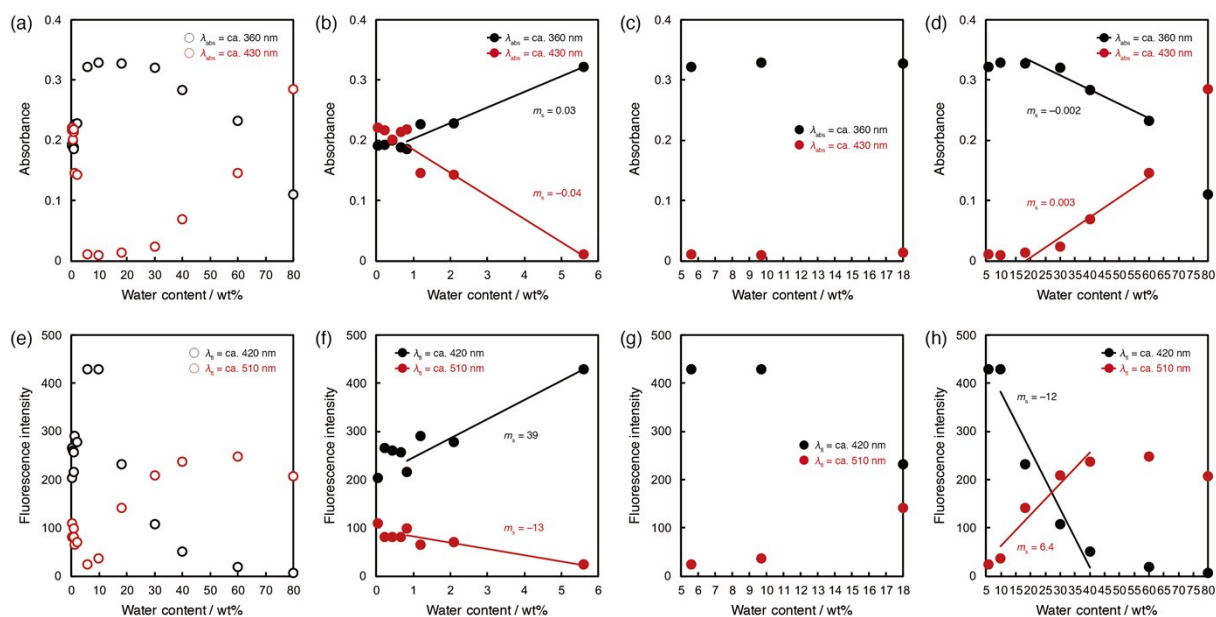

**Fig. S3** Results of another solution for demonstration of reproducibility. Peak intensities of photoabsorption bands at around 360 and 430 nm in acetonitrile solutions of **ET-1-BF<sub>3</sub>** with (a) 0.0288–80 wt%, (b) 0.0288–5.6 wt%, (c) 5.6–18 wt%, and (d) 5.6–80 wt% of water. Peak intensities of fluorescence bands at around 420 and 510 nm ( $\lambda^{\text{ex}} = 302 \text{ nm}$ ) in acetonitrile solutions of **ET-1-BF<sub>3</sub>** with (e) 0.0288–80 wt%, (f) 0.0288–5.6 wt%, (g) 5.6–18 wt%, and (h) 5.6–80 wt% of water.

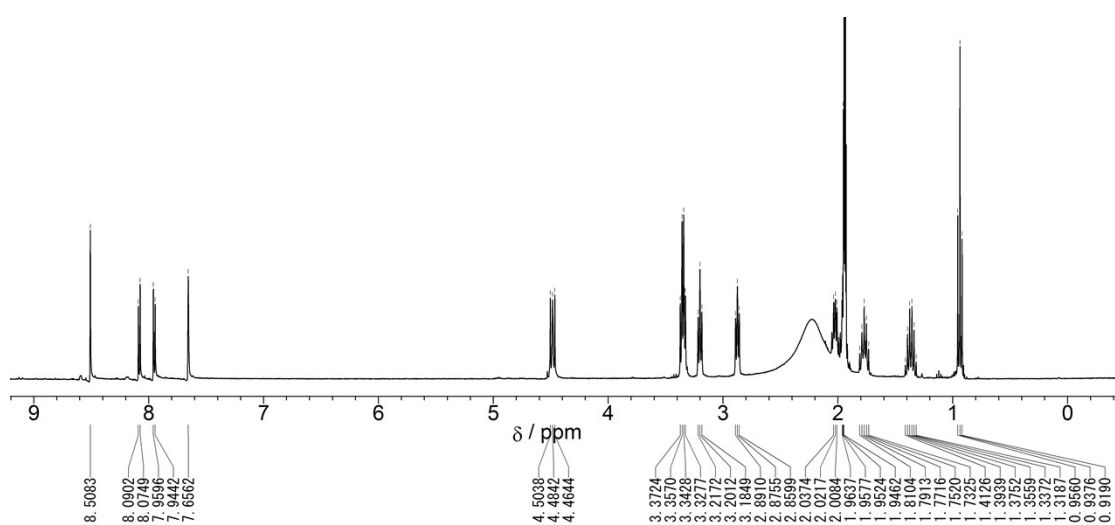

**Fig. S4** <sup>1</sup>H NMR spectrum of **ET-1-BF<sub>3</sub>** (CD<sub>3</sub>CN).

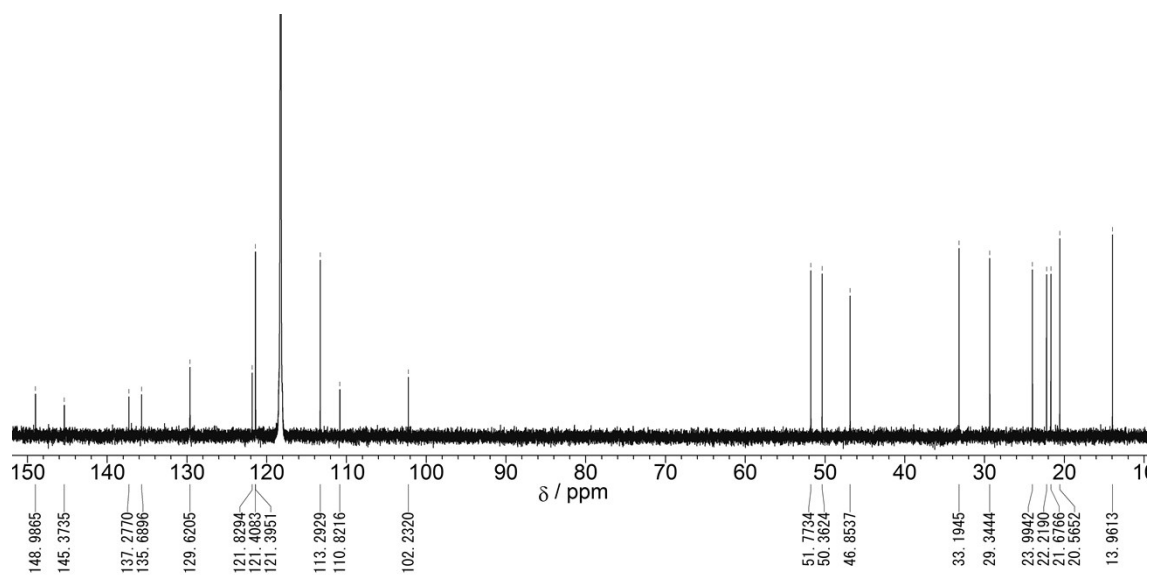

**Fig. S5**  $^{13}\text{C}$  NMR spectrum of **ET-1-BF<sub>3</sub>** ( $\text{CD}_3\text{CN}$ ).

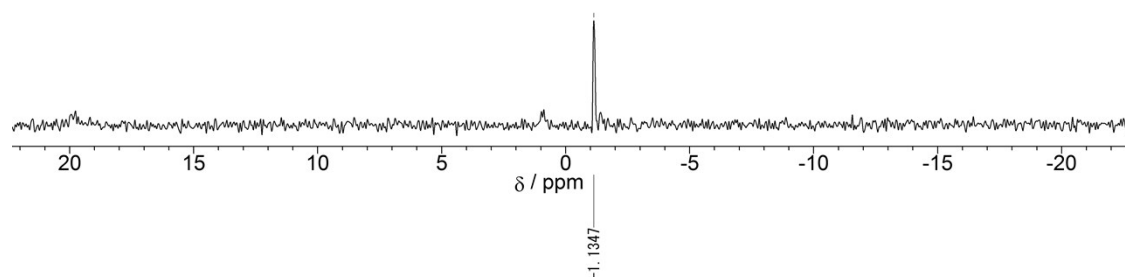

**Fig. S6**  $^{11}\text{B}$  NMR spectrum of **ET-1-BF<sub>3</sub>** ( $\text{CD}_3\text{CN}$ ).
